# Supplementary material for: Incidence and immunomic features of apyretic COVID-19 in patients affected by solid tumors: a prospective cohort study
Source: Springer Nature journal article supplement (doi:10.1186/s12967-022-03429-0), 2022-05-14

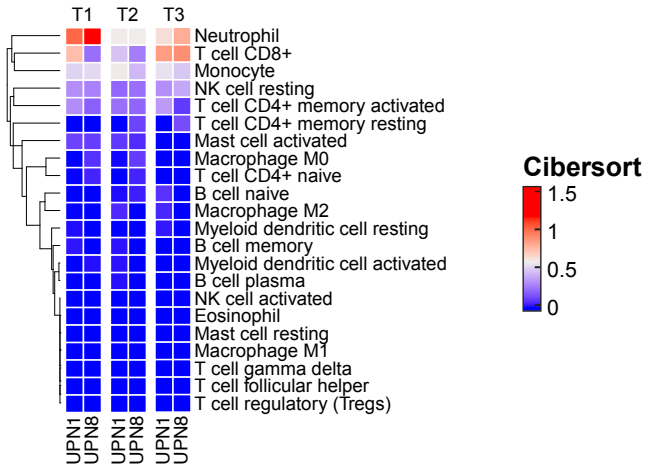

Supplement: MOESM3 [file 20402646]
